# Supplementary material for: Surface Hardness Impairment of Quorum Sensing and Swarming for Pseudomonas aeruginosa
Source: PLOS journal article supplement (doi:10.1371/journal.pone.0020888), 2011-06-07
Supplement: S6 (10.1371/journal.pone.0020888.s006) [file journal.pone.0020888.s006]

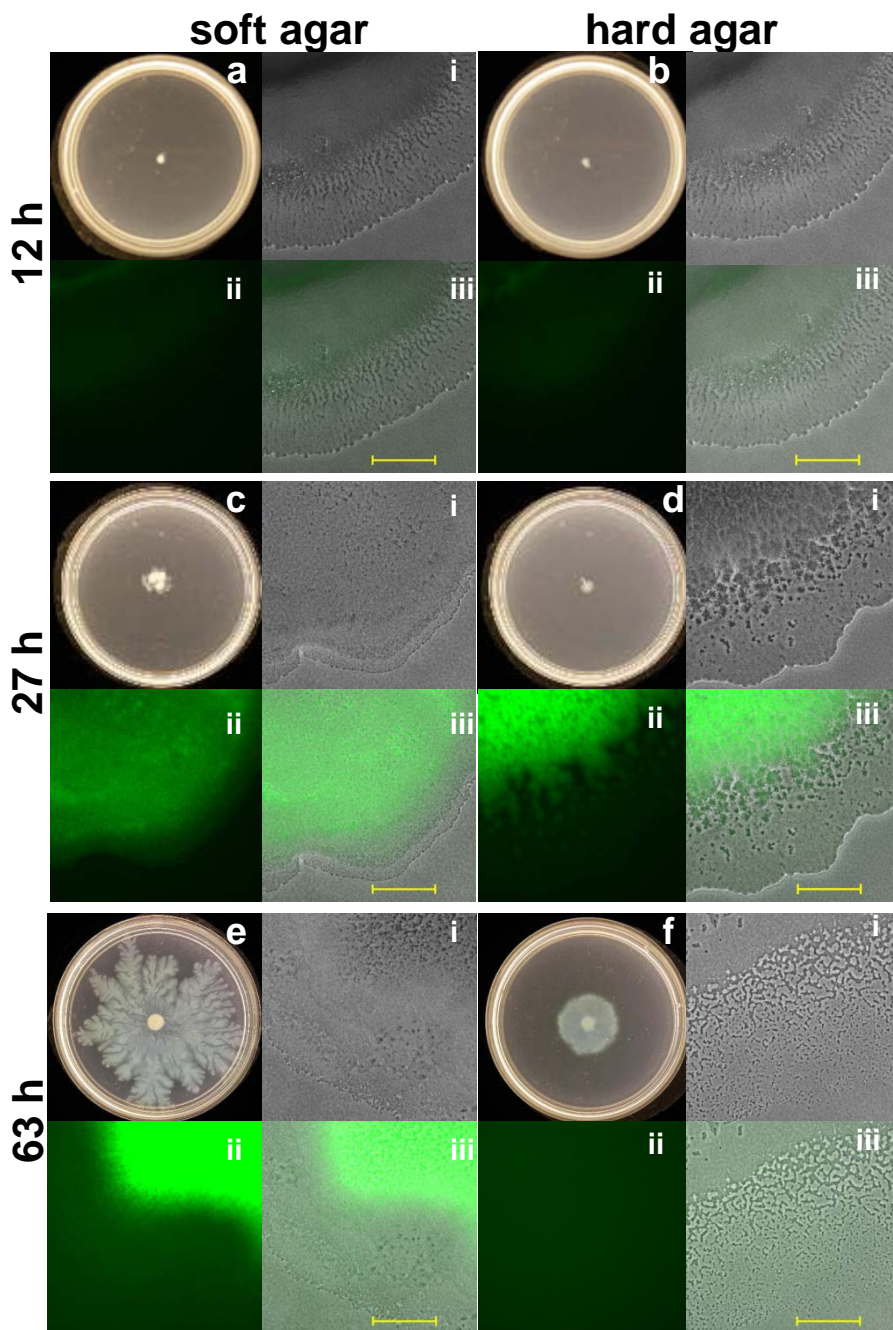

**Figure S4. *P. aeruginosa* swarming after 12, 27, and 63 hours for a rhamnolipid fluorescence reporter wild-type strain growing on soft (0.4%) and hard (0.6%) agar. Lettered panels show the entire swarm colony; (i) phase-contrast image of swarm edge; (ii) fluorescence of  $P_{rhlA}::gfp$  fusion; (iii) overlay of i+ii panels for each image showing proximity of rhamnolipid production to the swarm edge. Overlay scale bar = 200  $\mu$ m.**
